# Supplementary material
Source: ML conference proceedings conference paper supplement (https://proceedings.neurips.cc/paper_files/paper/2018/hash/8fb21ee7a2207526da55a679f0332de2-Abstract.html)
Supplement: Supplementary file [file 8fb21ee7a2207526da55a679f0332de2-Supplemental.zip]

---

# Optimal Algorithms for Non-Smooth Distributed Optimization in Networks

## SUPPLEMENTARY MATERIAL

---

Kevin Scaman<sup>1</sup> Francis Bach<sup>2</sup> Sébastien Bubeck<sup>3</sup> Yin Tat Lee<sup>3,4</sup> Laurent Massoulié<sup>2,5</sup>

<sup>1</sup> Huawei Noah's Ark Lab, <sup>2</sup> INRIA, Ecole Normale Supérieure, PSL Research University,

<sup>3</sup> Microsoft Research, <sup>4</sup> University of Washington, <sup>5</sup> MSR-INRIA Joint Centre

### Abstract

This supplementary document contains complete proofs of the theorems presented in the article “Optimal Algorithms for Non-Smooth Distributed Optimization in Networks”.

### 1 Proof of the convergence rate of DRS (Theorem 1)

Corollary 2.4 of [1] gives, with the appropriate choice of gradient step  $\eta_t$  and smoothing  $\gamma_t$ ,

$$\mathbb{E} [\bar{f}(\theta_T)] - \min_{\theta \in \mathcal{K}} \bar{f}(\theta) \leq \frac{10RL_g d^{1/4}}{T} + \frac{5RL_g}{\sqrt{TK}}. \quad (1)$$

Thus, to reach a precision  $\varepsilon > 0$ , we may set  $T = \left\lceil \frac{20RL_g d^{1/4}}{\varepsilon} \right\rceil$  and  $K = \left\lceil \frac{5RL_g d^{-1/4}}{\varepsilon} \right\rceil$ , leading to the desired bound on the time  $T_\varepsilon = T(2\Delta\tau + K)$  to reach  $\varepsilon$ .

### 2 Proof of the lower bound under global regularity (Theorem 2)

Let  $i_0 \in \mathcal{V}$  and  $i_1 \in \mathcal{V}$  be two nodes at distance  $\Delta$ . The function used by [2] to prove the oracle complexity for Lipschitz and bounded functions is

$$g_1(\theta) = \delta \max_{i \in \{1, \dots, t\}} \theta_i + \frac{\alpha}{2} \|\theta\|_2^2. \quad (2)$$

By considering this function on a single node (e.g.  $i_0$ ), at least  $O\left(\left(\frac{RL}{\varepsilon}\right)^2\right)$  subgradients will be necessary to obtain a precision  $\varepsilon$ . Moreover, we also split the difficult function used in [3]

$$g_2(\theta) = \gamma \sum_{i=1}^t |\theta_{i+1} - \theta_i| - \beta\theta_1 + \frac{\alpha}{2} \|\theta\|_2^2, \quad (3)$$

on the two extremal nodes  $i_0$  and  $i_1$  in order to ensure that communication is necessary between the most distant nodes of the network. The final function that we consider is, for all  $i \in \{1, \dots, n\}$ ,

$$f_i(\theta) = \begin{cases} \gamma \sum_{i=1}^k |\theta_{2i} - \theta_{2i-1}| + \delta \max_{i \in \{2k+2, \dots, 2k+1+l\}} \theta_i & \text{if } i = i_0 \\ \gamma \sum_{i=1}^k |\theta_{2i+1} - \theta_{2i}| - \beta\theta_1 + \frac{\alpha}{2} \|\theta\|_2^2 & \text{if } i = i_1 \\ 0 & \text{otherwise} \end{cases}, \quad (4)$$

where  $\gamma, \delta, \beta, \alpha > 0$  and  $k, l \geq 0$  are parameters of the function satisfying  $2k + l < d$ . The objective function is thus

$$\bar{f}(\theta) = \frac{1}{n} \left[ \gamma \sum_{i=1}^{2k} |\theta_{i+1} - \theta_i| - \beta \theta_1 + \delta \max_{i \in \{2k+2, \dots, 2k+1+l\}} \theta_i + \frac{\alpha}{2} \|\theta\|_2^2 \right] \quad (5)$$

First, note that reordering the coordinates of  $\theta$  between  $\theta_2$  and  $\theta_{2k+1}$  in a decreasing order can only decrease the value function  $\bar{f}(\theta)$ . Hence, the optimal value  $\theta^*$  verifies this constraint and

$$\bar{f}(\theta^*) = \frac{1}{n} \left[ -\gamma \theta_{2k+1}^* - (\beta - \gamma) \theta_1^* + \delta \max_{i \in \{2k+2, \dots, 2k+1+l\}} \theta_i^* + \frac{\alpha}{2} \|\theta^*\|_2^2 \right]. \quad (6)$$

Moreover, at the optimum, all the coordinates between  $\theta_2$  and  $\theta_{2k+1}$  are equal, all the coordinates between  $\theta_{2k+2}$  and  $\theta_{2k+1+l}$  are also equal, and all the coordinates after  $\theta_{2k+1+l}$  are zero. Hence

$$\bar{f}(\theta^*) = \frac{1}{n} \left[ -\gamma \theta_{2k+1}^* - (\beta - \gamma) \theta_1^* + \delta \theta_{2k+2}^* + \frac{\alpha}{2} \left( \theta_1^{*2} + 2k \theta_{2k+1}^{*2} + l \theta_{2k+2}^{*2} \right) \right], \quad (7)$$

and optimizing over  $\theta_1^* \geq \theta_{2k+1}^* \geq 0 \geq \theta_{2k+2}^*$  leads to, when  $\beta \geq \gamma(1 + \frac{1}{2k})$ ,

$$\bar{f}(\theta^*) = \frac{-1}{2\alpha n} \left[ (\beta - \gamma)^2 + \frac{\gamma^2}{2k} + \frac{\delta^2}{l} \right]. \quad (8)$$

Now note that, starting from  $\theta_0 = 0$ , each subgradient step can only increase the number of non-zero coordinates between  $\theta_{2k+2}$  and  $\theta_{2k+1+l}$  by at most one. Thus, when  $t < l$ , we have

$$\max_{i \in \{2k+2, \dots, 2k+1+l\}} \theta_{t,i} \geq 0. \quad (9)$$

Moreover, increasing the number of non-zero coordinates between  $\theta_1$  and  $\theta_{2k+1}$  requires at least one subgradient step and  $\Delta$  communication steps. As a result, when  $t < \min\{l, 2k\Delta\tau\}$ , we have  $\theta_{t,2k+1} = 0$  and

$$\begin{aligned} \bar{f}(\theta_t) &\geq \min_{\theta \in \mathbb{R}^d} \frac{1}{n} \left[ -(\beta - \gamma) \theta_1 + \frac{\alpha}{2} \|\theta\|_2^2 \right] \\ &\geq \frac{-(\beta - \gamma)^2}{2\alpha n}. \end{aligned} \quad (10)$$

Hence, we have, for  $t < \min\{l, 2k\Delta\tau\}$ ,

$$\bar{f}(\theta_t) - \bar{f}(\theta^*) \geq \frac{1}{2\alpha n} \left[ \frac{\gamma^2}{2k} + \frac{\delta^2}{l} \right]. \quad (11)$$

Optimizing  $\bar{f}$  over a ball of radius  $R \geq \|\theta^*\|_2$  thus leads to the previous approximation error bound, and we choose

$$R = \|\theta^*\|_2 = \frac{1}{\alpha^2} \left[ (\beta - \gamma)^2 + \frac{\gamma^2}{2k} + \frac{\delta^2}{l} \right]. \quad (12)$$

Finally, the Lipschitz constant of the objective function  $\bar{f}$  is

$$L_g = \frac{1}{n} \left[ \beta + 2\sqrt{2k+1}\gamma + \delta + \alpha R \right], \quad (13)$$

and setting the parameters of  $\bar{f}$  to  $\beta = \gamma(1 + \frac{1}{\sqrt{2k}})$ ,  $\delta = \frac{L_g n}{9}$ ,  $\gamma = \frac{L_g n}{9\sqrt{k}}$ ,  $l = \lfloor t \rfloor + 1$ , and  $k = \lfloor \frac{t}{2\Delta\tau} \rfloor + 1$  leads to  $t < \min\{l, 2k\Delta\tau\}$  and

$$\bar{f}(\theta_t) - \bar{f}(\theta^*) \geq \frac{RL_g}{36} \sqrt{\frac{1}{(1 + \frac{t}{2\Delta\tau})^2} + \frac{1}{1+t}}, \quad (14)$$

while  $\bar{f}$  is  $L$ -Lipschitz and  $\|\theta^*\|_2 \leq R$ .

### 3 Proof of the lower bound under local regularity (Theorem 3)

Following the idea introduced in [4], we prove Theorem 3 by applying Theorem 2 on linear graphs and splitting the local functions of Eq. (4) on multiple nodes to obtain  $L_g \approx L_\ell$ .

**Lemma 1.** Let  $\gamma \in (0, 1]$ . There exists a graph  $\mathcal{G}_\gamma$  of size  $n_\gamma$  and a gossip matrix  $W_\gamma \in \mathbb{R}^{n_\gamma \times n_\gamma}$  on this graph such that  $\gamma(W_\gamma) = \gamma$  and

$$\gamma \geq \frac{2}{(n_\gamma + 1)^2}. \quad (15)$$

When  $\gamma \geq 1/3$ ,  $\mathcal{G}_\gamma$  is a totally connected graph of size  $n_\gamma = 3$ . Otherwise,  $\mathcal{G}_\gamma$  is a linear graph of size  $n_\gamma \geq 3$ .

*Proof.* First of all, when  $\gamma \geq 1/3$ , we consider the totally connected network of 3 nodes, reweight only the edge  $(v_1, v_3)$  by  $a \in [0, 1]$ , and let  $W_a$  be its Laplacian matrix. If  $a = 1$ , then the network is totally connected and  $\gamma(W_a) = 1$ . If, on the contrary,  $a = 0$ , then the network is a linear graph and  $\gamma(W_a) = 1/3$ . Thus, by continuity of the eigenvalues of a matrix, there exists a value  $a \in [0, 1]$  such that  $\gamma(W_a) = \gamma$  and Eq. (15) is trivially verified. Otherwise, let  $x_n = \frac{1 - \cos(\frac{\pi}{n})}{1 + \cos(\frac{\pi}{n})}$  be a decreasing sequence of positive numbers. Since  $x_3 = 1/3$  and  $\lim_n x_n = 0$ , there exists  $n_\gamma \geq 3$  such that  $x_{n_\gamma} \geq \gamma > x_{n_\gamma+1}$ . Let  $\mathcal{G}_\gamma$  be the linear graph of size  $n_\gamma$  ordered from node  $v_1$  to  $v_{n_\gamma}$ , and weighted with  $w_{i,i+1} = 1 - a\mathbb{1}\{i = 1\}$ . If we take  $W_a$  as the Laplacian of the weighted graph  $\mathcal{G}_\gamma$ , a simple calculation gives that, if  $a = 0$ ,  $\gamma(W_a) = x_{n_\gamma}$  and, if  $a = 1$ , the network is disconnected and  $\gamma(W_a) = 0$ . Thus, there exists a value  $a \in [0, 1]$  such that  $\gamma(W_a) = \gamma$ . Finally, by definition of  $n_\gamma$ , one has  $\gamma > x_{n_\gamma+1} \geq \frac{2}{(n_\gamma+1)^2}$ .  $\square$

Let  $\gamma \in (0, 1]$  and  $\mathcal{G}_\gamma$  the graph of Lemma 1. We now consider  $I_0 = \{1, \dots, m\}$  and  $I_1 = \{n_\gamma - m + 1, \dots, n_\gamma\}$  where  $m = \lfloor \frac{n_\gamma+1}{3} \rfloor$ . When  $\gamma < 1/3$ , the distance  $d(I_0, I_1)$  between the two sets  $I_0$  and  $I_1$  is thus bounded by

$$d(I_0, I_1) = n_\gamma - 2m + 1 \geq \frac{n_\gamma + 1}{3}, \quad (16)$$

and we have

$$\frac{1}{\sqrt{\gamma}} \leq \frac{3d(I_0, I_1)}{\sqrt{2}}. \quad (17)$$

Moreover, Eq. (17) also trivially holds when  $\gamma \geq 1/3$ . We now consider the local functions of Eq. (4) splitted on  $I_0$  and  $I_1$ :

$$f_i(\theta) = \begin{cases} \frac{1}{m} \left[ \gamma \sum_{i=1}^k |\theta_{2i} - \theta_{2i-1}| + \delta \max_{i \in \{2k+2, \dots, 2k+1+l\}} \theta_i \right] & \text{if } i \in I_0 \\ \frac{1}{m} \left[ \gamma \sum_{i=1}^k |\theta_{2i+1} - \theta_{2i}| - \beta \theta_1 + \frac{\alpha}{2} \|\theta\|_2^2 \right] & \text{if } i \in I_1 \\ 0 & \text{otherwise} \end{cases} \quad (18)$$

The average function  $\bar{f}$  remains unchanged and the time to communicate a vector between a node of  $I_0$  and a node of  $I_1$  is at least  $d(I_0, I_1)\tau$ . Thus, the same result as Theorem 2 holds with  $\Delta = d(I_0, I_1)$ . We thus have

$$\bar{f}(\theta_{i,t}) - \min_{\theta \in B_2(R)} \bar{f}(\theta) \geq \frac{RL_g}{36} \sqrt{\frac{1}{(1 + \frac{t}{2d(I_0, I_1)\tau})^2} + \frac{1}{1+t}}. \quad (19)$$

Finally, the local Lipschitz constant  $L_\ell$  is bounded by

$$L_\ell \leq \sqrt{\frac{n_\gamma}{m}} L_g \leq 3L_g, \quad (20)$$

and Eq. (17), Eq. (19) and Eq. (20) lead to the desired result.

#### 4 Proof of the convergence rate of MSPD (Theorem 4 and Theorem 5)

Theorem 1 (b) in [5] implies that, provided  $\tau\sigma\lambda_1(W) < 1$ , the algorithm with exact proximal step leads to a restricted primal-dual gap

$$\sup_{\|\Lambda'\|_F \leq c} \left\{ \frac{1}{n} \sum_{i=1}^n f_i(\theta_i) - \text{tr } \Lambda'^\top \Theta A \right\} - \inf_{\Theta' \in \mathcal{K}^n} \left\{ \frac{1}{n} \sum_{i=1}^n f_i(\theta'_i) - \text{tr } \Lambda^\top \Theta' A \right\}$$

of

$$\varepsilon = \frac{1}{2t} \left( \frac{nR^2}{\eta} + \frac{c^2}{\sigma} \right).$$

This implies that our candidate  $\Theta$  is such that

$$\frac{1}{n} \sum_{i=1}^n f_i(\theta_i) + c \|\Theta A\|_F \leq \inf_{\Theta' \in \mathcal{K}^n} \left\{ \frac{1}{n} \sum_{i=1}^n f_i(\theta'_i) + c \|\Theta' A\|_F + \varepsilon \right\}.$$

Let  $\theta$  be the average of all  $\theta_i$ . We have:

$$\begin{aligned} \frac{1}{n} \sum_{i=1}^n f_i(\theta) &\leq \frac{1}{n} \sum_{i=1}^n f_i(\theta_i) + \frac{1}{n} \sum_{i=1}^n L_i \|\theta_i - \theta\| \leq \frac{1}{n} \sum_{i=1}^n f_i(\theta_i) + \frac{1}{\sqrt{n}} \sqrt{\frac{1}{n} \sum_{i=1}^n L_i^2} \cdot \|\Theta(I - \mathbf{1}\mathbf{1}^\top/n)\|_F \\ &\leq \frac{1}{n} \sum_{i=1}^n f_i(\theta_i) + \frac{1}{\sqrt{n}} \sqrt{\frac{\frac{1}{n} \sum_{i=1}^n L_i^2}{\lambda_{n-1}(W)}} \cdot \|\Theta A\|_F. \end{aligned}$$

Thus, if we take  $c = \frac{1}{\sqrt{n}} \sqrt{\frac{\frac{1}{n} \sum_{i=1}^n L_i^2}{\lambda_{n-1}(W)}}$ , we obtain

$$\frac{1}{n} \sum_{i=1}^n f_i(\theta) \leq \frac{1}{n} \sum_{i=1}^n f_i(\theta_*) + \varepsilon,$$

and we thus obtain a  $\varepsilon$ -minimizer of the original problem.

We have

$$\varepsilon \leq \frac{1}{2T} \left( \frac{nR^2}{\eta} + \frac{1}{\lambda_{n-1}(W)} \frac{1}{n^2} \sum_{i=1}^n L_i^2 \right)$$

with the constraint  $\sigma\eta\lambda_1(W) < 1$ . This leads to, with the choice

$$\eta = nR \sqrt{\frac{\lambda_{n-1}(W)/\lambda_1(W)}{\sum_{i=1}^n L_i^2/n}}$$

and taking  $\sigma$  to the limit  $\sigma\eta\lambda_1(W) = 1$ , to a convergence rate of

$$\varepsilon = \frac{1}{T} R \sqrt{\frac{1}{n} \sum_{i=1}^n L_i^2} \sqrt{\frac{\lambda_1(W)}{\lambda_{n-1}(W)}}.$$

Since we cannot use the exact proximal operator of  $f_i$ , we instead approximate it. If we approximate (with the proper notion of gap [5, Eq. (11)]) each  $\operatorname{argmin}_{\theta_i \in \mathcal{K}} f_i(\theta_i) + \frac{n}{2\eta} \|\theta_i - z\|^2$  up to  $\delta_i$ , then the overall added gap is  $\frac{1}{n} \sum_{i=1}^n \delta_i$ . If we do  $M$  steps of subgradient steps then the associated gap is  $\delta_i = \frac{L_i^2 \eta}{nM}$  (standard result for strongly-convex subgradient [6]). Therefore the added gap is

$$\frac{1}{M} R \sqrt{\frac{1}{n} \sum_{i=1}^n L_i^2} \sqrt{\frac{\lambda_1(W)}{\lambda_{n-1}(W)}}.$$

Therefore after  $T$  communication steps, i.e., communication time  $T\tau$  plus  $MT$  subgradient evaluations, i.e., time  $MT$ , we get an error of

$$\left( \frac{1}{T} + \frac{1}{M} \right) \frac{RL_\ell}{\sqrt{\gamma}},$$

where  $\gamma = \gamma(W) = \lambda_{n-1}(W)/\lambda_1(W)$ . Thus to reach  $\varepsilon$ , it takes

$$\left\lceil \frac{2RL_\ell}{\varepsilon} \frac{1}{\sqrt{\gamma}} \right\rceil \tau + \left\lceil \frac{4RL_\ell}{\varepsilon} \frac{1}{\sqrt{\gamma}} \right\rceil^2.$$

The second term is optimal, while the first term is not. We therefore do accelerated gossip instead of plain gossip. By performing  $K$  steps of gossip instead of one, with  $K = \lfloor 1/\sqrt{\gamma} \rfloor$ , the eigengap is lower bounded by  $\gamma(P_K(W)) \geq 1/4$ , and the overall time to obtain an error below  $\varepsilon$  becomes

$$\left\lceil \frac{4RL_\ell}{\varepsilon} \right\rceil \frac{\tau}{\sqrt{\gamma(W)}} + \left\lceil \frac{4RL_\ell}{\varepsilon} \right\rceil^2,$$

as announced.

## References

- [1] John C. Duchi, Peter L. Bartlett, and Martin J. Wainwright. Randomized smoothing for stochastic optimization. *SIAM Journal on Optimization*, 22(2):674–701, 2012.
- [2] Sébastien Bubeck. Convex optimization: Algorithms and complexity. *Foundations and Trends in Machine Learning*, 8(3-4):231–357, 2015.
- [3] Yossi Arjevani and Ohad Shamir. Communication complexity of distributed convex learning and optimization. In *Advances in Neural Information Processing Systems 28*, pages 1756–1764, 2015.
- [4] Kevin Scaman, Francis Bach, Sébastien Bubeck, Yin Tat Lee, and Laurent Massoulié. Optimal algorithms for smooth and strongly convex distributed optimization in networks. In *Proceedings of the 34th International Conference on Machine Learning ICML*, pages 3027–3036, 2017.
- [5] Antonin Chambolle and Thomas Pock. A first-order primal-dual algorithm for convex problems with applications to imaging. *Journal of Mathematical Imaging and Vision*, 40(1):120–145, May 2011.
- [6] Simon Lacoste-Julien, Mark Schmidt, and Francis Bach. A simpler approach to obtaining an  $O(1/t)$  convergence rate for the projected stochastic subgradient method. Technical Report 1212.2002, arXiv, 2012.
